# Supplementary figures and images for: In vitro evaluation of Resveratrol as a potential pre-exposure prophylactic drug against Trypanosoma cruzi infection
Source: PubMed Central journal article supplement — Int J Parasitol Drugs Drug Resist. 2022 Aug 19;20:54–64. doi: 10.1016/j.ijpddr.2022.08.003 (PMC9474288; doi:10.1016/j.ijpddr.2022.08.003), 2022-08-19

SUPPLEMENTARY FIGURE S1

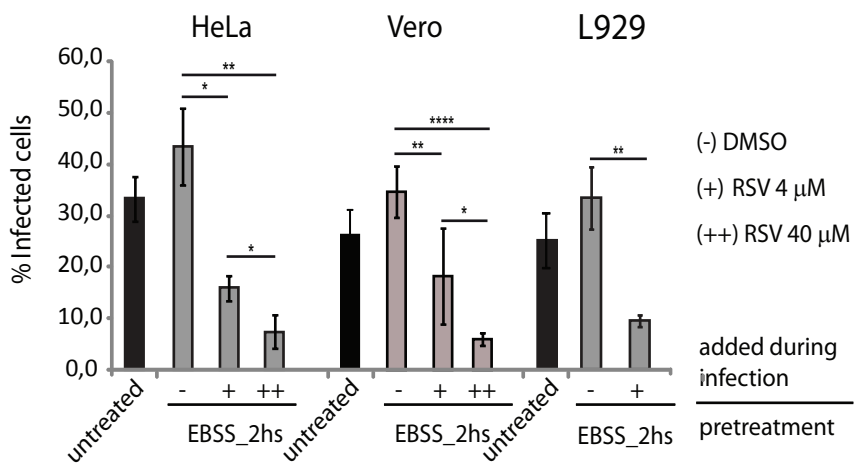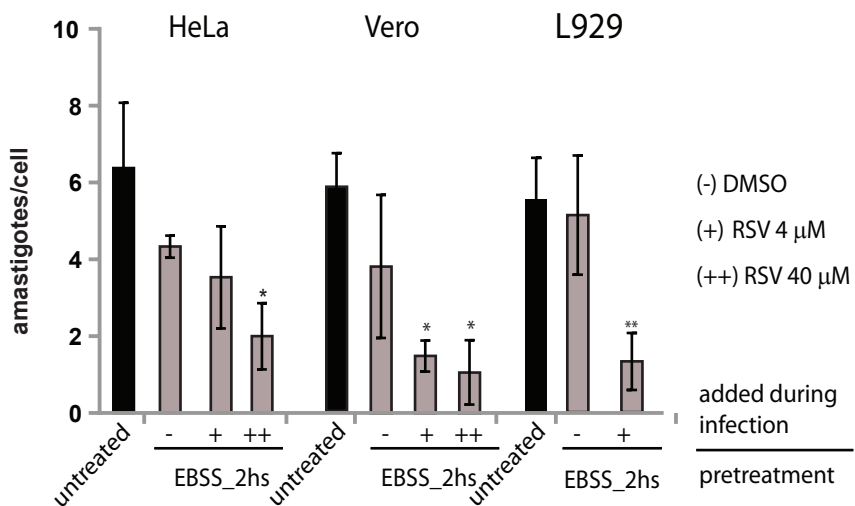

Supplement: mmc1.pdf [file mmc1.pdf]
